# Supplementary material for: Manipulating interactions between plant stress responses and soil methane oxidation rates
Source: Copernicus journal article supplement (doi:10.5194/bg-2018-102), 2018-04-05
Supplement: Supplementary file [file bg-2018-102-AC2-supplement.pdf]

## **Anonymous Referee #1**

Received and published: 22 May 2018

Minor points L67 “may be”

R: Thanks. This has been revised. Line 67

L128 “was determined”

R: Thanks. This has been revised. Line 128

L163-164 How is the biochar used in this study different from others? Please provide detailed information.

R: This has been revised.

Another reason for this might be related to the properties of the biochar (C:N ratio of 51.84, 9.2 t ha<sup>-1</sup>) used in this study when compared with agricultural soils in Finland (C:N ratio of 101.07, 9 t ha<sup>-1</sup>) (e.g. Karhu et al., 2011) and in East Asia (C:N ratio of 79.65, 2 t ha<sup>-1</sup>) (e.g. Kim et al., 2017). The lower C:N ratio of the biochar used in this study can incorporate more N fertilizer into the soils, which could reduce soil CH<sub>4</sub> uptake as N fertilizer can inhibit methanotrophic activities (see Kolb, 2009). Overall, the reason why BC addition did not result in increased soil moisture in this case is unclear. Further studies is needed to investigate the effects of biochar application on the factors influencing soil CH<sub>4</sub> oxidation.

Lines 161-170

L183 “and directly”

R: Thanks. This has been revised. Line 189

1  
2  
3  
4  
5  
6  
7  
8  
9  
10  
11  
12  
13  
14  
15  
16  
17  
18  
19  
20  
21  
22  
23  
24  
25  
26  
27  
28

## Technical Note

Manipulating interactions between plant stress responses and soil methane oxidation rates

Xiaoqi Zhou<sup>1,2,3</sup>, Chengyuan Xu<sup>2,4</sup>, Shahla H Bai<sup>2,5</sup>, Zhihong Xu<sup>2</sup>, Simeon J Smaill<sup>6\*</sup>, Peter W Clinton<sup>6</sup>, Chengrong Chen<sup>2,3</sup>

<sup>1</sup>Tiantong National Station for Forest Ecosystem Research, Center for Global Change and Ecological Forecasting, Shanghai Key Lab for Urban Ecological Processes and Eco-restoration, Institute of Eco-Chongming, School of Ecological and Environmental Sciences, East China Normal University, Shanghai 200241, China

<sup>2</sup>Environmental Futures Research Institute, Griffith University, Nathan, Brisbane, 4111, Australia

<sup>3</sup>Griffith School of Environment, Griffith University, Nathan, Brisbane, 4111, Australia

<sup>4</sup>School of Medical and Applied Sciences, Central Queensland University, Bundaberg, QLD, 4760, Australia

<sup>5</sup>Faculty of Science, Health, Education and Engineering, University of the Sunshine Coast, Maroochydore, DC Qld 4558, Australia

<sup>6</sup>Scion, PO Box 29237, Riccarton, Christchurch 8440, New Zealand

\* Corresponding author: Dr. Simeon J Smaill

simeon.smaill@scionresearch.com

29

30 **Abstract**

31

32 It has recently been hypothesised that ethylene, released into soil by stressed plants,  
33 reduces the oxidation of methane by methanotroph. To test this, a field trial was  
34 established in which maize plants were grown with and without soil moisture stress,  
35 and the effects of addition aminoethoxyvinylglycine (AVG; an ethylene biosynthesis  
36 inhibitor), and biochar (increases soil water holding capacity and reduces plant stress)  
37 were determined following the static incubation of soil samples. AVG increased  
38 methane oxidation rates by 50% ( $P=0.039$ ), but only in the absence of irrigation. No  
39 other treatment effects were observed. This result provides evidence for a positive  
40 feedback system between plant stress, ethylene production, and impacts on  
41 methanotrophic activity.

42

43 **Keywords** methane oxidation; plant stress; ethylene inhibition; methanotroph; positive  
44 feedback

45

46

47

48

49

50

51

52

53

54

55

56

57

58

## 59 **1 Introduction**

60 The atmospheric concentration of methane (CH<sub>4</sub>) has almost tripled over the past 150  
61 years, making a substantial contribution to climate change (Forster et al., 2007).  
62 Aerobic soils provide an important habitat for methanotrophic bacteria, and provide the  
63 only significant biological sink for atmospheric CH<sub>4</sub> (20-45 Tg CH<sub>4</sub> yr<sup>-1</sup>) (Forster et al.,  
64 2007). However, CH<sub>4</sub> uptake by these soil ecosystems can be impacted by  
65 environmental stress (Kolb, 2009). A common plant physiological response to  
66 ecological stress, such as drought, is the production of ethylene (Morgan and Drew,  
67 1997). In soils, however, ethylene **may be** inhibitory to methanotrophic activity (Jäkel  
68 et al., 2004; Pierek et al., 2006; Zhou et al., 2013), and thereby reduce CH<sub>4</sub> oxidation.  
69 This potential interaction needs to be understood, as it may constitute an important  
70 positive feedback loop between climate disruption, soil ecosystem disturbance, and  
71 reduced CH<sub>4</sub> removal from the atmosphere (Bousquet et al., 2006; Zhou et al., 2013).

72 To test our previous hypothesis that drought-induced *in planta* ethylene production  
73 reduces soil CH<sub>4</sub> oxidation rates (Zhou et al., 2013), we manipulated plant stress  
74 responses by adding the ethylene biosynthesis inhibitor aminoethoxyvinylglycine ([S]-  
75 trans-2-amino-4-(2-aminoethoxy)-3-butenoic acid hydrochloride; hereafter AVG)  
76 (Boller et al., 1979). In addition, the study tested the hypothesis that addition of biochar  
77 to soils may result in increased water holding capacity, reducing drought stress and  
78 thereby acting as a potential tool to maintain CH<sub>4</sub> oxidation (Karhu et al., 2011). This  
79 is illustrated conceptually in Fig. 1, in which the application of irrigation (IR) and  
80 biochar (BC) are able to maintain rates of CH<sub>4</sub> oxidation by reducing moisture stress  
81 and therefore ethylene production, whereas AVG prevents the production of ethylene  
82 after the plant experiences stress.

## 83 **2 Material and methods**

### 84 **2.1 Study site**

85 The study site was located in the Bjelke-Petersen *Research Station* at Kingaroy  
86 (26.53° S, 151.83° E) in the South Burnett Region of Queensland, Australia.  
87 Precipitation averages 789 mm per annum with erratic summer droughts frequent in the  
88 region. Soil at the field trial site soil is an acidic red ferrosol (pH 5.5) with high cation

89 exchange capacity (Isbell, 1993). The site has a long history of cultivation, supporting  
90 peanut and maize rotations with winter fallows.

## 91 **2.2 Experiment design and management**

92 A full factorial, split plot design field trial was established as follows: two IR  
93 treatments (IR and no IR) × two BC treatments (BC at 9.2 t ha<sup>-1</sup> and no BC) × two  
94 ethylene suppression treatments (AVG and no AVG). Each treatment had five replicates,  
95 producing a total of 40 plots. Due to practical concerns regarding application and  
96 maintenance, the IR treatments were established in two discrete areas that were spanned  
97 by five blocks. A schematic of the trial site is given in the supplementary information  
98 (Fig. S1).

99 The BC treatment was established through application of peanut shell BC to the  
100 surface of the planting zone (~450 mm wide strip each row) in early 2013. The BC was  
101 incorporated into the soil with a rotary hoe to a depth of 200 mm. The chemical  
102 properties of the peanut shell BC are provided in the supplementary information (Table  
103 S1).

104 The site was machine planted with maize cultivar Pioneer 32p55 (Dupont Pioneer  
105 Australia) at a density of approximately 4 plants m<sup>-2</sup> in late January, 2014. Compound  
106 fertiliser (N:P<sub>2</sub>O<sub>5</sub>:K<sub>2</sub>O 11.9:14.1:9.9) at 180 kg ha<sup>-1</sup>, and urea at 100 kg ha<sup>-1</sup>, were  
107 applied at sowing. Trickle tapes, installed into plots receiving IR, were used to distribute  
108 water equivalent to ~50 mm of rainfall whenever there was a continuous dry spell for  
109 two weeks throughout the growing season (late January to late June).

110 To reduce the *in planta* production of ethylene, the commercial plant growth  
111 regulator ReTain (containing 15% AVG, Valent Bioscience Cooperation, Walnut Creek,  
112 CA, USA) was sprayed onto the crop four times from mid-April to mid-June (the peak  
113 maize growth window) at intervals of three weeks. During each event, the treated rows  
114 of maize received approximately 750 ml of ReTain solution (prepared at the label rate  
115 of 1 g ReTain l<sup>-1</sup> water) directly to the surface of the plants.

## 116 **2.3 Sample collection and analysis**

117 In late June 2014, six soil cores from 0 - 100 mm depth were collected from the maize  
118 rooting zone of each plot using a 30 mm diameter soil auger. All samples were collected

119 from the two middle rows of maize in each plot, and the six soil cores from within each  
120 plot bulked to a single plot sample. After sieving to 2 mm, a 50 g (fresh mass)  
121 subsample of each sample was set aside for CH<sub>4</sub> oxidation rate measurements and the  
122 remaining material dried at 105°C for 48 hours to determine soil moisture content.

123 Soil CH<sub>4</sub> oxidation rates were determined using the laboratory incubation. Briefly,  
124 about 20 g soil subsamples were incubated in 1-litre glass jars at ambient atmospheric  
125 CH<sub>4</sub> concentration (assumed to be 1.9 ppm) for one week in the dark at 25°C.  
126 Headspace gas samples (approximately 30 ml) were collected through a rubber septum  
127 in the jar lid at the beginning and the end of the incubation, and concentrations of CH<sub>4</sub>  
128 was determined using GC-FID (GC-2010 Plus, Shimadzu, Japan). The CH<sub>4</sub> oxidation  
129 rates in each jar were calculated from differences in the headspace CH<sub>4</sub> concentration  
130 over the incubation time (Zhou et al., 2008), and adjusted to soil dry weight. Standards  
131 were measured once every 10 samples; the coefficient of variation in CH<sub>4</sub> oxidation  
132 rate was less than 5% and control jars had ambient CH<sub>4</sub> concentrations.

#### 133 **2.4 Statistical analysis**

134 Statistical analysis was carried out in R-3.2.3 (Zhou et al., 2017) using a multi-factor  
135 ANOVA model incorporating an error structure accounting for the split-plot design  
136 associated with the non-random assignment of the IR treatment. The multi-comparison  
137 analysis methods provided in the “easyanova 4.0” R package was used to test for  
138 treatment interactions.

### 139 **3 Results**

140 Over the course of the field trial, five dry spells occurred. Irrigation to the IR-plots  
141 resulted in delivery of 250 mm more water to this treatment than the controls. This  
142 resulted in significantly increased soil moisture ( $P < 0.001$ ) in IR soils (18.9%) compared  
143 with the non-irrigated soils (15.4%) at sampling time. Neither the AVG or BC  
144 treatments had any effect ( $P > 0.05$ ) on soil moisture.

145 No significant main effects were observed, but a significant interaction between  
146 irrigation and AVG application was detected (Table 1). Exploration of this interaction  
147 with multi-comparison analysis determined that CH<sub>4</sub> oxidation rates were increased by  
148 50% following AVG application ( $P = 0.039$ ), but only in the absence of IR (Fig. 2). The

149 addition of biochar had no effect on CH<sub>4</sub> oxidation rates either as a main or interactive  
150 effect.

#### 151 **4 Discussion**

152 The increase in CH<sub>4</sub> oxidation with the AVG treatment either alone or in combination  
153 with the BC treatment aligns with past studies assessing the effect of increased ethylene  
154 concentrations on soil CH<sub>4</sub> oxidation rates (Jäckel et al., 2004; Xu et al., 2008). This  
155 response also supports the hypothesis that *in planta* ethylene production in response to  
156 stress decreases the capacity of soil to support methanotrophic activity (Zhou et al.,  
157 2013).

158 The lack of effect of BC on CH<sub>4</sub> oxidation is at odds with the results of previous  
159 work (e.g. Karhu et al., 2011; Kim et al., 2017). However, BC added in this study had  
160 no influence on soil moisture content, and this is proposed to be a key mechanism for  
161 BC to support CH<sub>4</sub> oxidation in drought conditions (Karhu et al., 2011). Another reason  
162 for this might be related to the properties of the biochar (C:N ratio of 51.84, 9.2 t ha<sup>-1</sup>)  
163 used in this study when compared with agricultural soils in Finland (C:N ratio of 101.07,  
164 9 t ha<sup>-1</sup>) (e.g. Karhu et al., 2011) and in East Asia (C:N ratio of 79.65, 2 t ha<sup>-1</sup>) (e.g. Kim  
165 et al., 2017). The lower C:N ratio of the biochar used in this study can incorporate more  
166 N fertilizer into the soils, which could reduce soil CH<sub>4</sub> uptake as N fertilizer can inhibit  
167 methanotrophic activities (see Kolb, 2009). Overall, the reason why BC addition did  
168 not result in increased soil moisture in this case is unclear. Further studies is needed to  
169 investigate the effects of biochar application on the factors influencing soil CH<sub>4</sub>  
170 oxidation.

171 The significant interaction between the AVG and IR treatments is more difficult to  
172 reconcile. The IR treatment was intended to significantly increase soil moisture content  
173 compared to the no IR treatment, reducing water stress and likely *in planta* ethylene  
174 production. It was noted that increased soil moisture content can directly influence  
175 methanotrophic activity, as water-driven increases in microbial activity can enhance  
176 methanotroph, whereas water content that exceed field capacity can rapidly decrease  
177 CH<sub>4</sub> oxidation rates by reducing gas mobility through soil pores (Le Mer and Roger.,  
178 2001). Given the initial soil water content and scale of the increase with the IR treatment,

179 direct stimulation of CH<sub>4</sub> oxidation was considered the most likely outcome when  
180 considering plant-independent effects. Consequently, it was anticipated that any effect  
181 of AVG on CH<sub>4</sub> oxidation (putatively via reductions in ethylene production) would only  
182 manifest without IR, as the IR treatment would make the AVG treatment redundant.  
183 However, CH<sub>4</sub> oxidation rates in plots treated with the either IR or IR and AVG in  
184 combination were not significantly greater than untreated control plots. It is possible  
185 that the moisture addition associated with the IR treatment was insufficient to  
186 substantially alleviate plant drought stress, driving an increase in ethylene production,  
187 which could then account for the numerical difference between the AVG and IR  
188 treatments (Fig. 2). The water addition may have also been insufficient to meaningfully  
189 and directly stimulate methanotroph activity. However, it would be expected that the  
190 combination of IR and AVG would produce CH<sub>4</sub> oxidation rates either the same, or  
191 potentially greater than, those observed for AVG alone. This was not the case, and the  
192 explanation for the significant interaction remains unknown. As discussed above, it is  
193 possible for increased soil moisture content to inhibit CH<sub>4</sub> oxidation via decreased  
194 porosity and gas diffusion (see Zhou et al., 2014), but given the IR treatment alone did  
195 not reduce CH<sub>4</sub> oxidation rates relative to the control, this is not a feasible explanation  
196 in this case.

197 The lack of data explicitly describing ethylene release into soil in response to the  
198 treatments is a limitation to this trial. However, the quantification of ethylene in soil is  
199 not trivial, particularly when conducted over time (i.e. continuous) and was outside the  
200 resources available for this study. However, given the findings of this study, and  
201 considering treatments were field-based, further investigations of the interactions  
202 between AVG, plant stress, and CH<sub>4</sub> oxidation should be conducted. In these studies,  
203 consideration should be given to collection and integration of ethylene data, particularly  
204 given that this data may help shed light on the nature of any interactions between  
205 treatments.

206 Overall, the findings of this study indicate that application of an ethylene  
207 biosynthesis inhibitor to plant tissue can cause a measurable increase in the capability  
208 of soil to oxidise CH<sub>4</sub> under moisture stressed conditions. This supports the hypothesis



209 that the stress-induced production of ethylene by plants can disrupt the activity of  
210 methanotrophs, as well as identifying a potential management pathway to help retain,  
211 or even enhance, the methanotrophic capability of soils in productive systems. Given  
212 the global importance of a positive feedback between environmental stress, plant  
213 ethylene production, and lowered microbial CH<sub>4</sub> oxidation activity, further work in this  
214 area is needed. In addition, methods to moderate impacts on the methanotrophic  
215 community, such as use of alternative forms or rates of biochar application, require  
216 investigation to enable provision of important ecosystem services.

217

218 **Acknowledgements** The research was jointly supported by National Natural Science  
219 Foundation of China (No. 31600406), Shanghai Science and Technology Innovation  
220 Fund (No. 18391902300), Griffith University Research Fellowship, a Collaborative  
221 Research Network-the University of the Sunshine Coast Research Futures Project Seed  
222 Grant, New Zealand and the “Growing Confidence in Forestry’s Future” research  
223 programme (C04X1306), which is jointly funded by the Ministry of Business  
224 Information and Employment (MBIE) and the Forest Growers Levy Trust, with the  
225 support of the NZ Forest Owners Association (FOA) and the NZ Farm Forestry  
226 Association (FFA).

227

## 228 **References**

- 229 Argueso C.T., Hansen M. and Kieber J.J.: Regulation of ethylene biosynthesis, *J Plant Growth*  
230 *Regul.*, 26, 92-105, 2007.
- 231 Boller T., Herner R.C. and Kende H.: Assay for and enzymatic formation of an ethylene precursor,  
232 1-aminocyclopropane-1-carboxylic acid, *Planta* 145, 293-303, 1979.
- 233 Bousquet P., Ciais P., Miller J.B., Dlugokencky E.J., Hauglustaine D.A., Prigent C., van der Werf  
234 G.R., Peylin P., Brunke E.G., Carouge C., Langenfelds R.L., Lathière J., Papa F., Ramonet  
235 M., Schmidt M., Steele L.P., Tyler S.C. and White J.: Contribution of anthropogenic and  
236 natural sources to atmospheric methane variability, *Nature*, 443, 439-443, 2006.
- 237 Forster P., Ramaswamy V., Artaxo P., Berntsen T., Betts R., Fahey D.W., Haywood J., Lean J., Lowe  
238 D.C., Myhre G., Nganga J., Prinn R., Raga G., Schulz M. and van Dorland R.: Changes in

239 atmospheric constituents and in radiative forcing. In: Solomon S et al. (eds) *Climate Change*  
240 *2007: The Physical Science Basis*. Cambridge University Press, UK, pp 130–234, 2007.

241 Ho A., Reim A., Kim S.Y., Meima-Franke M., Termorshuizen A., de Boer W., van der Putten W.H.  
242 and Bodelier P.L.E.: Unexpected stimulation of soil methane uptake as emergent property  
243 of agricultural soils following bio-based residue application, *Global Change Biol.*, 21, 3864-  
244 3879, 2015.

245 Isbell R.F.: A classification system for Australian soils (third approximation) CSIRO Australia  
246 Division of Soils Technical Report 2/1993, CSIRO Division of Soils and National Landcare  
247 Program project, Townsville, 1993.

248 Jäckel U., Schnell S. and Conrad R.: Microbial ethylene production and inhibition of  
249 methanotrophic activity in a deciduous forest soil, *Soil Biol. Biochem.*, 36, 835-840, 2004.

250 Karhu K., Mattila T., Bergström I. and Regina K.: Biochar addition to agricultural soil increased  
251 CH<sub>4</sub> uptake and water holding capacity - Results from a short-term pilot field study, *Agric.*  
252 *Ecosyst. Environ.*, 140, 309-313, 2011.

253 Kim J., Yoo G., Kim D., Ding W. and Kang H.: Combined application of biochar and slow-release  
254 fertilizer reduces methane emission but enhances rice yield by different mechanisms, *Appl.*  
255 *Soil Ecol.*, 117-118, 57-62, 2017.

256 Kolb S.: The quest for atmospheric methane oxidizers in forest soils, *Environ. Microbiol. Rep.*, 1,  
257 336–346, 2009.

258 Le Mer J. and Roger P.: Production, oxidation, emission and consumption of methane by soils: A  
259 review, *Eur. J. Soil Biol.*, 37, 25-50, 2001.

260 Morgan P.W. and Drew M.C.: Ethylene and plant responses to stress, *Physiologia Plantarum*, 100,  
261 620–630, 1997.

262 Pierik R., Tholen D., Poorter H., Visser E.J.W., Voeseek L.A.C.J.: The Janus face of ethylene:  
263 growth inhibition and stimulation, *Trends Plant Sci.*, 11,176–183, 2006.

264 Xu X., Yuan B. and Wei J.: Vertical distribution and interaction of ethylene and methane in  
265 temperate volcanic forest soils, *Geoderma*, 145, 231-237, 2008.

266 Zhou X.Q., Wang Y.F., Huang X.Z., Tian J.Q. and Hao Y.B.: Effect of grazing intensities on the  
267 activity and community structure of methane-oxidizing bacteria of grassland soil in Inner  
268 Mongolia, *Nutr. Cycl. Agroecosys.*, 80, 145-152, 2008.

269 Zhou X.Q., Smaill S.J. and Clinton P.W.: Methane oxidation needs less stressed plants, Trends Plant  
270 Sci., 18, 657-659, 2013.

271 Zhou, X.Q., Dong, H.B., Chen, C.R., Smaill, S.J., Clinton, P.W.: Ethylene rather than dissolved  
272 organic carbon controls methane uptake in upland soils, Global Change Biol 20, 2379-2380,  
273 2014.

274 Zhou X.Q., Guo Z.Y., Chen C.R. and Jia Z.J.: Soil microbial community structure and diversity are  
275 largely influenced by soil pH and nutrient quality in 78-year-old tree plantations,  
276 Biogeosciences, 14, 2101-2111, 2017.

277

278

279

280

281

282  
 283  
 284  
 285  
 286  
 287  
 288  
 289  
 290  
 291  
 292  
 293  
 294  
 295

**Table 1.** Analysis of treatment effects on methane oxidation rates, accounting for the split-plot design of the trial.

| <i>Block</i>           | Df | Sum Sq | Mean Sq | F Value | Pr(>F)       |
|------------------------|----|--------|---------|---------|--------------|
| Residuals              | 4  | 25.27  | 6.318   |         |              |
| <i>Block:IR</i>        | Df | Sum Sq | Mean Sq | F Value | Pr(>F)       |
| IR                     | 1  | 0.057  | 0.057   | 0.01    | 0.925        |
| Residuals              | 4  | 22.785 | 5.696   |         |              |
| <i>Block:IR:BC</i>     | Df | Sum Sq | Mean Sq | F Value | Pr(>F)       |
| BC                     | 1  | 0.946  | 0.946   | 0.245   | 0.634        |
| IR:BC                  | 1  | 0.815  | 0.815   | 0.211   | 0.658        |
| Residuals              | 8  | 30.924 | 3.865   |         |              |
| <i>Block:IR:BC:AVG</i> | Df | Sum Sq | Mean Sq | F Value | Pr(>F)       |
| AVG                    | 1  | 4.77   | 4.768   | 1.796   | 0.199        |
| IR:AVG                 | 1  | 17.38  | 17.384  | 6.549   | <b>0.021</b> |
| BC:AVG                 | 1  | 6.19   | 6.186   | 2.33    | 0.146        |
| IR:BC:AVG              | 1  | 0.42   | 0.422   | 0.159   | 0.695        |
| Residuals              | 16 | 42.47  | 2.654   |         |              |

296  
297  
298  
299  
300  
301  
302

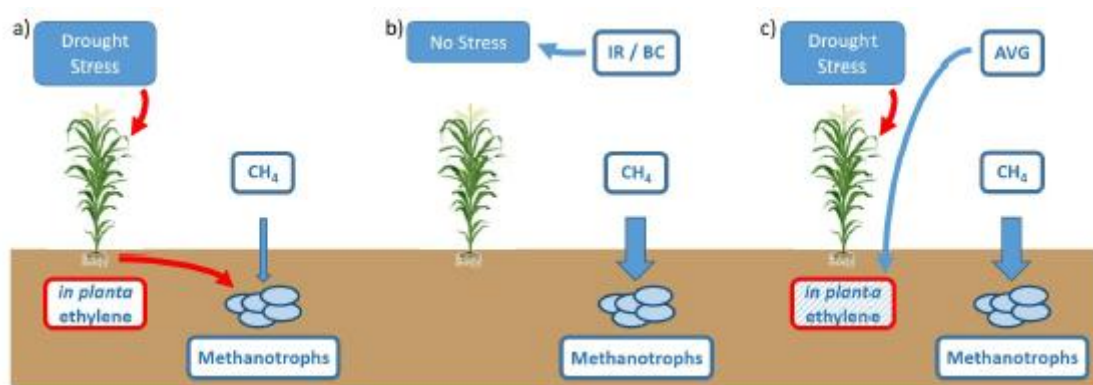

303  
304

305 **Fig. 1.** Conceptual outline of the proposed relationships between soil CH<sub>4</sub> oxidation  
306 rates and aboveground plant biomass with regard to the anticipated effects of the  
307 treatments applied in this study. a) Under environmental stress, *in planta* ethylene  
308 production is stimulated, resulting in ethylene exudation into the soil atmosphere and  
309 the inhibition of soil CH<sub>4</sub> oxidation by methanotrophs. b) The application of irrigation  
310 (IR) increases soil moisture while the application of biochar (BC) increases soil  
311 moisture holding capacity, both acting to reduce plant stress and prevent ethylene  
312 exudation into the soil atmosphere. c) The application of AVG disrupts ethylene  
313 production, and limiting or preventing the inhibition of CH<sub>4</sub> oxidation by the stressed  
314 plant.

315  
316  
317  
318  
319

320  
321  
322  
323  
324  
325

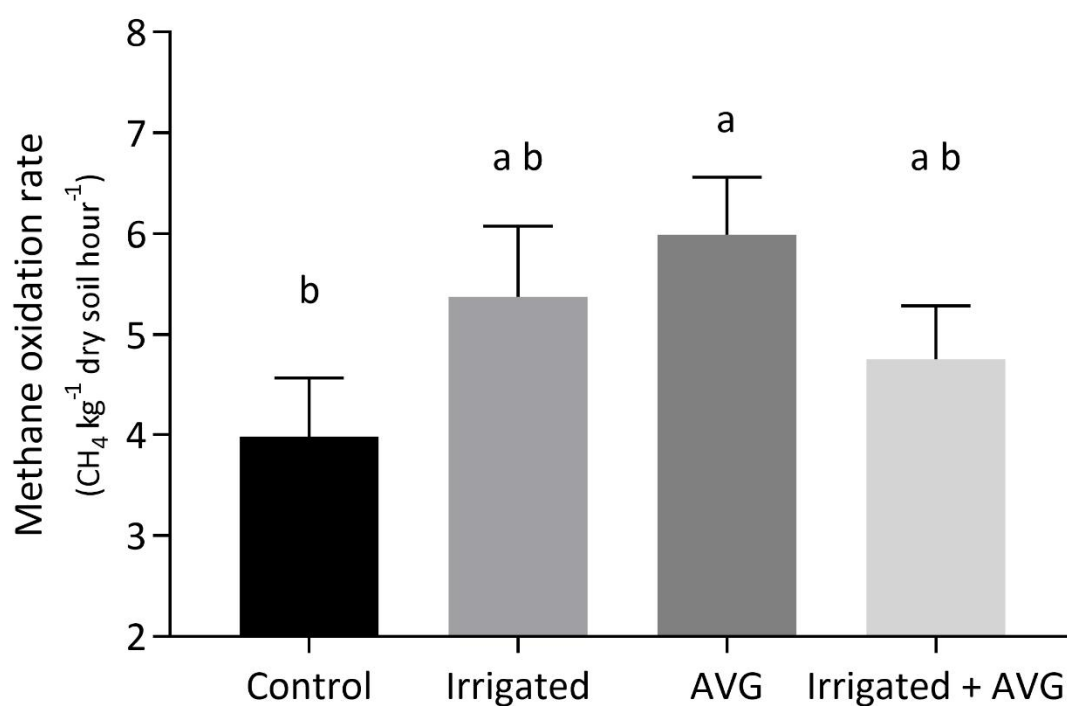

326  
327  
328  
329  
330  
331  
332  
333  
334

**Fig. 2.** Response of soil CH<sub>4</sub> oxidation rates to treatment with irrigation and AVG under maize plants. Letter groupings indicate significant differences at P<0.05; error bars are standard error of the mean. The biochar treatment did not influence results, so the data presented are the means of both biochar and no biochar treatments.
